# Supplementary material for: Modeling and Simulation of Coupled Power Transmission Line: A Systematic Approach
Source: Research Square preprint supplement (doi:10.21203/rs.3.rs-2732193/v1), 2023-03-28
Supplement: Supplementary file 1 [file 08763fbf8f78e756443b6839.docx]

**Highlights**

1. Space and time simulation of the transmission power potentials was achieved via coupled transmission model,
2. The space component of the coupled model made estimation of transmission losses possible,
3. In addition to transmission power potentials, material decay or aging losses were integrated into the coupled model,
4. Model results validated with measured (field) data, which support its effectiveness for prediction of power and power losses in the transmission line.
